# Supplementary material for: Relation of severe COVID-19 to polypharmacy and prescribing of psychotropic drugs: the REACT-SCOT case-control study
Source: Springer Nature journal article supplement (doi:10.1186/s12916-021-01907-8), 2021-02-21
Supplement: MOESM1 [file 18890586]

## Supplementary information

### Table S1

Association of severe COVID-19 with number of non-cardiovascular drug classes dispensed, in those not resident in a care home by diagnosis of at least one listed condition.

### Table S2

Association of severe COVID-19 with number of non-cardiovascular drug classes dispensed, in those not resident in a care home by age group .

### Table S3

Univariate conditional odds ratios for dispensing of BNF subparagraph codes associated with care home status in controls aged 75 years, filtered to retain rows with at least 50 exposed care home residents.

### Table S4

Univariate associations of severe COVID-19 with drugs in four subparagraphs of BNF chapter 4, in those not resident in a care home and not treated for cancer in last year, filtered to retain rows with at least 20 exposed individuals.

### Table S5

Comparison of associations with exposure only in the most recent 120-day time window with exposure only in the previous 120-day time window (baseline category for rate ratios) for drug classes on the Laporte-Healy list with at least 500 cases and controls exposed only in the earlier time window.

### Table S6

Associations of severe COVID-19 with dispensed average daily dose of opioids and proton pump inhibitors, with and without adjustment for prespecified covariates. For opioids the prespecified covariates are care home residence, SIMD quintile and any history of neoplasm. For proton pump

inhibitors the prespecified covariates are care home residence, SIMD quintile, any diagnosis of ICD-10 codes K20-K31 (diseases of esophagus, stomach and duodenum), non-steroidal anti-inflammatory drugs, anti-platelet agents and anticoagulants.

### Table S7

Associations of severe COVID-19 with prescribed drugs in BNF chapter 2 by subparagraph code, restricted to those not resident in a care home and filtered to retain rows with at least 50 exposed individuals. Multivariate rate ratios are based on a joint model with all drug classes in the table as covariates.

### Table S8

Associations of severe COVID-19 with prescribed drugs in BNF chapter 10 by approved name, restricted to those not resident in a care home and filtered to retain rows with at least 50 exposed individuals. Multivariate rate ratios are based on a joint model that includes all drugs in the table as covariates.

## Supplementary Tables

**Table S1.** Association of severe COVID-19 with number of non-cardiovascular drug classes dispensed, in those not resident in a care home by diagnosis of at least one listed condition

| Number of drug classes                                            | Controls (33803) | Cases (2357) | Rate ratio (95% CI) | <i>p</i> -value     |
|-------------------------------------------------------------------|------------------|--------------|---------------------|---------------------|
| <b>No listed condition (17127 controls, 637 cases)</b>            |                  |              |                     |                     |
| 0                                                                 | 4461 (26%)       | 120 (19%)    |                     |                     |
| 1 to 3                                                            | 7090 (41%)       | 224 (35%)    | 1.60 (1.26, 2.04)   | $1 \times 10^{-4}$  |
| 4 to 6                                                            | 3552 (21%)       | 150 (24%)    | 2.70 (2.04, 3.57)   | $4 \times 10^{-12}$ |
| 7 to 9                                                            | 1419 (8%)        | 79 (12%)     | 4.25 (2.96, 6.09)   | $4 \times 10^{-15}$ |
| 10 to 12                                                          | 456 (3%)         | 46 (7%)      | 7.7 (4.8, 12.3)     | $1 \times 10^{-17}$ |
| ≥12                                                               | 149 (1%)         | 18 (3%)      | 7.3 (3.8, 14.0)     | $2 \times 10^{-9}$  |
| <b>At least one listed condition (16676 controls, 1720 cases)</b> |                  |              |                     |                     |
| 0                                                                 | 501 (3%)         | 47 (3%)      |                     |                     |
| 1 to 3                                                            | 3946 (24%)       | 218 (13%)    | 0.61 (0.43, 0.88)   | 0.009               |
| 4 to 6                                                            | 4940 (30%)       | 428 (25%)    | 1.01 (0.71, 1.43)   | 1                   |
| 7 to 9                                                            | 3664 (22%)       | 390 (23%)    | 1.34 (0.94, 1.91)   | 0.1                 |
| 10 to 12                                                          | 2055 (12%)       | 282 (16%)    | 1.87 (1.30, 2.70)   | $8 \times 10^{-4}$  |
| ≥12                                                               | 1570 (9%)        | 355 (21%)    | 2.94 (2.05, 4.24)   | $6 \times 10^{-9}$  |

**Table S2.** Association of severe COVID-19 with number of non-cardiovascular drug classes dispensed, by age group in those not resident in a care home

| Number of drug classes                                    | Controls (33803) | Cases (2357) | Rate ratio (95% CI) | <i>p</i> -value     |
|-----------------------------------------------------------|------------------|--------------|---------------------|---------------------|
| <b>Age 0-74 years (13178 controls, 1140 cases)</b>        |                  |              |                     |                     |
| 0                                                         | 2632 (20%)       | 95 (8%)      |                     |                     |
| 1 to 3                                                    | 3709 (28%)       | 210 (18%)    | 1.87 (1.45, 2.42)   | $1 \times 10^{-6}$  |
| 4 to 6                                                    | 2921 (22%)       | 207 (18%)    | 2.64 (2.03, 3.43)   | $3 \times 10^{-13}$ |
| 7 to 9                                                    | 1824 (14%)       | 194 (17%)    | 4.36 (3.33, 5.71)   | $8 \times 10^{-27}$ |
| 10 to 12                                                  | 1003 (8%)        | 149 (13%)    | 6.1 (4.6, 8.1)      | $2 \times 10^{-35}$ |
| ≥12                                                       | 1089 (8%)        | 285 (25%)    | 11.6 (8.9, 15.1)    | $2 \times 10^{-73}$ |
| <b>Age 75 years and over (20625 controls, 1217 cases)</b> |                  |              |                     |                     |
| 0                                                         | 826 (4%)         | 23 (2%)      |                     |                     |
| 1 to 3                                                    | 2957 (14%)       | 67 (6%)      | 0.77 (0.47, 1.26)   | 0.3                 |
| 4 to 6                                                    | 5014 (24%)       | 179 (15%)    | 1.23 (0.78, 1.94)   | 0.4                 |
| 7 to 9                                                    | 4948 (24%)       | 277 (23%)    | 1.92 (1.23, 3.01)   | 0.004               |
| 10 to 12                                                  | 3473 (17%)       | 259 (21%)    | 2.65 (1.69, 4.17)   | $2 \times 10^{-5}$  |
| ≥12                                                       | 3407 (17%)       | 412 (34%)    | 4.43 (2.84, 6.91)   | $6 \times 10^{-11}$ |

**Table S3.** Univariate conditional odds ratios for dispensing of BNF subparagraph codes associated with care home status in controls aged 75 years, filtered to retain rows with at least 50 exposed care home residents

|                                                                    | Independent<br>(20625) | Care home res-<br>ident (2841) | Odds ratio (95%<br>CI) | <i>p</i> -value      |
|--------------------------------------------------------------------|------------------------|--------------------------------|------------------------|----------------------|
| 101021 Compound Alginates and proprietary indigestion preparations | 1296 (6%)              | 147 (5%)                       | 0.69 (0.56, 0.85)      | $6 \times 10^{-4}$   |
| 102000 Antispasmodic and other drugs altering gut motility         | 771 (4%)               | 172 (6%)                       | 1.59 (1.28, 1.98)      | $3 \times 10^{-5}$   |
| 106010 Bulk-forming laxatives                                      | 680 (3%)               | 54 (2%)                        | 0.47 (0.34, 0.65)      | $4 \times 10^{-6}$   |
| 106020 Stimulant laxatives                                         | 1579 (8%)              | 903 (32%)                      | 4.69 (4.13, 5.32)      | $1 \times 10^{-125}$ |
| 106040 Osmotic laxatives                                           | 3328 (16%)             | 1481 (52%)                     | 4.89 (4.40, 5.44)      | $2 \times 10^{-187}$ |
| 107010 Soothing haemorrhoidal preparations                         | 202 (1%)               | 75 (3%)                        | 2.85 (1.97, 4.11)      | $3 \times 10^{-8}$   |
| 401010 Hypnotics                                                   | 989 (5%)               | 275 (10%)                      | 1.83 (1.54, 2.19)      | $3 \times 10^{-11}$  |
| 401020 Anxiolytics                                                 | 806 (4%)               | 471 (17%)                      | 4.69 (3.97, 5.53)      | $1 \times 10^{-74}$  |
| 402010 Antipsychotic drugs                                         | 294 (1%)               | 528 (19%)                      | 18.9 (15.0, 23.6)      | $3 \times 10^{-143}$ |
| 403010 Tricyclic and related antidepressant drugs                  | 1780 (9%)              | 409 (14%)                      | 2.01 (1.74, 2.34)      | $2 \times 10^{-20}$  |
| 403030 Selective serotonin re-uptake inhibitors                    | 1525 (7%)              | 606 (21%)                      | 3.12 (2.72, 3.58)      | $4 \times 10^{-60}$  |
| 403040 Other antidepressant drugs                                  | 938 (5%)               | 511 (18%)                      | 4.92 (4.20, 5.77)      | $4 \times 10^{-86}$  |
| 407010 Non-opioid analgesics and compound preparations             | 8618 (42%)             | 2000 (70%)                     | 2.84 (2.56, 3.15)      | $2 \times 10^{-86}$  |
| 407020 Opioid analgesics                                           | 2292 (11%)             | 635 (22%)                      | 2.23 (1.97, 2.54)      | $3 \times 10^{-35}$  |
| 408010 Control of epilepsy                                         | 1506 (7%)              | 288 (10%)                      | 1.71 (1.45, 2.01)      | $1 \times 10^{-10}$  |
| 409010 Dopaminergic drugs used in parkinsonism                     | 344 (2%)               | 83 (3%)                        | 1.88 (1.39, 2.55)      | $5 \times 10^{-5}$   |
| 411000 Drugs for dementia                                          | 761 (4%)               | 625 (22%)                      | 7.5 (6.4, 8.8)         | $3 \times 10^{-132}$ |
| 501012 Penicillinase-resistant penicillins                         | 1111 (5%)              | 251 (9%)                       | 1.46 (1.22, 1.75)      | $4 \times 10^{-5}$   |
| 501013 Broad-spectrum penicillins                                  | 2761 (13%)             | 616 (22%)                      | 1.78 (1.57, 2.01)      | $8 \times 10^{-20}$  |
| 501021 Cephalosporins                                              | 226 (1%)               | 65 (2%)                        | 1.88 (1.34, 2.63)      | $3 \times 10^{-4}$   |
| 501080 Sulfonamides and trimethoprim                               | 1619 (8%)              | 536 (19%)                      | 2.29 (2.00, 2.63)      | $1 \times 10^{-32}$  |
| 501130 Urinary-tract infections                                    | 1180 (6%)              | 400 (14%)                      | 2.60 (2.22, 3.04)      | $8 \times 10^{-33}$  |
| 502030 Polyene antifungals                                         | 212 (1%)               | 80 (3%)                        | 2.85 (2.05, 3.96)      | $4 \times 10^{-10}$  |
| 901011 Oral iron                                                   | 1585 (8%)              | 358 (13%)                      | 1.50 (1.29, 1.74)      | $2 \times 10^{-7}$   |
| 901020 Drugs used in megaloblastic anaemias                        | 2742 (13%)             | 683 (24%)                      | 1.77 (1.57, 2.00)      | $7 \times 10^{-21}$  |
| 902021 Electrolytes and water                                      | 42 (0%)                | 87 (3%)                        | 9.2 (5.5, 15.4)        | $2 \times 10^{-17}$  |
| 904020 Enteral nutrition                                           | 365 (2%)               | 291 (10%)                      | 5.9 (4.7, 7.3)         | $6 \times 10^{-56}$  |
| 906026 Thiamine hydrochloride (B1)                                 | 266 (1%)               | 76 (3%)                        | 3.57 (2.55, 5.00)      | $2 \times 10^{-13}$  |
| 906040 Vitamin D                                                   | 4509 (22%)             | 1138 (40%)                     | 1.54 (1.39, 1.71)      | $7 \times 10^{-16}$  |
| 1001010 Non-steroidal anti-inflammatory drugs                      | 960 (5%)               | 50 (2%)                        | 0.53 (0.39, 0.73)      | $1 \times 10^{-4}$   |
| 1001040 Gout and cytotoxic induced hyperuricaemia                  | 1214 (6%)              | 90 (3%)                        | 0.60 (0.46, 0.77)      | $8 \times 10^{-5}$   |
| 1003020 Rubefacients, topical NSAIDs, capsaicin and poultice       | 3686 (18%)             | 660 (23%)                      | 1.28 (1.14, 1.43)      | $4 \times 10^{-5}$   |

**Table S4.** Univariate associations of severe COVID-19 with drugs in four subparagraphs of BNF chapter 4, in those not resident in a care home and not treated for cancer in last year, filtered to retain rows with at least 20 exposed individuals

|                                     | Controls (30820) | Cases (2062) | Rate ratio (95% CI) | <i>p</i> -value     |
|-------------------------------------|------------------|--------------|---------------------|---------------------|
| <b>Antipsychotic drugs</b>          |                  |              |                     |                     |
| Aripiprazole                        | 38 (0%)          | 12 (1%)      | 3.19 (1.61, 6.33)   | $9 \times 10^{-4}$  |
| Olanzapine                          | 95 (0%)          | 18 (1%)      | 2.68 (1.57, 4.56)   | $3 \times 10^{-4}$  |
| Levomepromazine                     | 27 (0%)          | 17 (1%)      | 9.9 (4.7, 20.6)     | $1 \times 10^{-9}$  |
| Risperidone                         | 123 (0%)         | 40 (2%)      | 4.90 (3.26, 7.38)   | $3 \times 10^{-14}$ |
| Haloperidol                         | 17 (0%)          | 9 (0%)       | 9.9 (3.6, 26.9)     | $7 \times 10^{-6}$  |
| Chlorpromazine hydrochloride        | 26 (0%)          | 7 (0%)       | 3.00 (1.28, 7.03)   | 0.01                |
| Amisulpride                         | 21 (0%)          | 4 (0%)       | 6.0 (1.7, 21.4)     | 0.005               |
| <b>Drugs for nausea and vertigo</b> |                  |              |                     |                     |
| Promethazine                        | 767 (2%)         | 59 (3%)      | 1.37 (1.03, 1.82)   | 0.03                |
| Cinnarizine                         | 150 (0%)         | 12 (1%)      | 1.46 (0.78, 2.71)   | 0.2                 |
| Cyclizine                           | 282 (1%)         | 42 (2%)      | 2.62 (1.84, 3.74)   | $1 \times 10^{-7}$  |
| Metoclopramide hydrochloride        | 159 (1%)         | 24 (1%)      | 2.60 (1.62, 4.16)   | $7 \times 10^{-5}$  |
| Betahistine dihydrochloride         | 367 (1%)         | 17 (1%)      | 0.69 (0.41, 1.14)   | 0.1                 |
| Domperidone                         | 54 (0%)          | 9 (0%)       | 2.35 (1.10, 4.99)   | 0.03                |
| <b>Opioids</b>                      |                  |              |                     |                     |
| Morphine                            | 453 (1%)         | 121 (6%)     | 4.55 (3.60, 5.76)   | $1 \times 10^{-36}$ |
| Codeine phosphate                   | 564 (2%)         | 82 (4%)      | 2.68 (2.05, 3.50)   | $5 \times 10^{-13}$ |
| Tramadol hydrochloride              | 1136 (4%)        | 118 (6%)     | 1.74 (1.41, 2.13)   | $2 \times 10^{-7}$  |
| Fentanyl                            | 102 (0%)         | 14 (1%)      | 2.17 (1.18, 4.00)   | 0.01                |
| Buprenorphine                       | 154 (0%)         | 9 (0%)       | 1.18 (0.57, 2.45)   | 0.6                 |
| Oxycodone                           | 249 (1%)         | 55 (3%)      | 4.27 (3.05, 5.99)   | $3 \times 10^{-17}$ |
| <b>Gabapentinoids</b>               |                  |              |                     |                     |
| Gabapentin                          | 969 (3%)         | 115 (6%)     | 1.92 (1.56, 2.37)   | $1 \times 10^{-9}$  |
| Lamotrigine                         | 143 (0%)         | 21 (1%)      | 2.22 (1.37, 3.60)   | 0.001               |
| <b>Control of epilepsy</b>          |                  |              |                     |                     |
| Topiramate                          | 34 (0%)          | 5 (0%)       | 1.96 (0.74, 5.17)   | 0.2                 |
| Carbamazepine                       | 174 (1%)         | 14 (1%)      | 1.20 (0.68, 2.10)   | 0.5                 |
| Clonazepam                          | 45 (0%)          | 10 (0%)      | 3.07 (1.49, 6.32)   | 0.002               |
| Levetiracetam                       | 137 (0%)         | 24 (1%)      | 2.62 (1.64, 4.17)   | $5 \times 10^{-5}$  |
| Sodium valproate                    | 104 (0%)         | 9 (0%)       | 1.02 (0.51, 2.06)   | 1                   |
| Phenobarbital                       | 20 (0%)          | 4 (0%)       | 2.28 (0.70, 7.39)   | 0.2                 |
| Phenytoin                           | 49 (0%)          | 11 (1%)      | 3.08 (1.54, 6.17)   | 0.001               |
| Primidone                           | 29 (0%)          | 4 (0%)       | 1.91 (0.64, 5.70)   | 0.2                 |
| Lacosamide                          | 19 (0%)          | 2 (0%)       | 1.52 (0.34, 6.79)   | 0.6                 |

**Table S5.** Comparison of associations with exposure only in the most recent 120-day time window with exposure only in the previous 120-day time window (baseline category for rate ratios) for drug classes on the Laporte-Healy list with at least 500 cases and controls exposed only in the earlier time window

| Exposure category                                            | Controls<br>(36738) | Cases (4251) | Rate ratio (95%<br>CI) | <i>p</i> -value    |
|--------------------------------------------------------------|---------------------|--------------|------------------------|--------------------|
| <b>Proton pump inhibitors</b>                                |                     |              |                        |                    |
| Non-recent only                                              | 1039 (3%)           | 123 (3%)     |                        |                    |
| Recent only                                                  | 1329 (4%)           | 206 (5%)     | 1.32 (1.04, 1.68)      | 0.02               |
| <b>Antihistamines</b>                                        |                     |              |                        |                    |
| Non-recent only                                              | 759 (2%)            | 104 (2%)     |                        |                    |
| Recent only                                                  | 551 (1%)            | 102 (2%)     | 1.32 (0.98, 1.78)      | 0.07               |
| <b>Anxiolytics</b>                                           |                     |              |                        |                    |
| Non-recent only                                              | 441 (1%)            | 112 (3%)     |                        |                    |
| Recent only                                                  | 453 (1%)            | 157 (4%)     | 1.37 (1.03, 1.82)      | 0.03               |
| <b>Tricyclic and related antidepressant drugs</b>            |                     |              |                        |                    |
| Non-recent only                                              | 442 (1%)            | 58 (1%)      |                        |                    |
| Recent only                                                  | 396 (1%)            | 52 (1%)      | 1.02 (0.69, 1.53)      | 0.9                |
| <b>Drugs used in nausea and vertigo</b>                      |                     |              |                        |                    |
| Non-recent only                                              | 634 (2%)            | 85 (2%)      |                        |                    |
| Recent only                                                  | 607 (2%)            | 106 (2%)     | 1.29 (0.94, 1.76)      | 0.1                |
| <b>Opioid analgesics</b>                                     |                     |              |                        |                    |
| Non-recent only                                              | 694 (2%)            | 128 (3%)     |                        |                    |
| Recent only                                                  | 777 (2%)            | 215 (5%)     | 1.53 (1.20, 1.96)      | $7 \times 10^{-4}$ |
| <b>Antimuscarinic drugs used in parkinsonism</b>             |                     |              |                        |                    |
| Non-recent only                                              | 634 (2%)            | 85 (2%)      |                        |                    |
| Recent only                                                  | 607 (2%)            | 106 (2%)     | 1.29 (0.94, 1.76)      | 0.1                |
| <b>Drugs for urinary frequency enuresis and incontinence</b> |                     |              |                        |                    |
| Non-recent only                                              | 634 (2%)            | 85 (2%)      |                        |                    |
| Recent only                                                  | 607 (2%)            | 106 (2%)     | 1.29 (0.94, 1.76)      | 0.1                |

**Table S6.** Associations of severe COVID-19 with dispensed average daily dose of opioids and proton pump inhibitors, with and without adjustment for prespecified covariates. For opioids the prespecified covariates are care home residence, SIMD quintile and any history of neoplasm. For proton pump inhibitors the prespecified covariates are care home residence, SIMD quintile, any diagnosis of ICD-10 codes K20-K31 (diseases of esophagus, stomach and duodenum), non-steroidal anti-inflammatory drugs, anti-platelet agents and anticoagulants.

| Average dose                                                       | Univariate       |              |                     |                       | Adjusted for covariates |                       |  |  |
|--------------------------------------------------------------------|------------------|--------------|---------------------|-----------------------|-------------------------|-----------------------|--|--|
|                                                                    | Controls (36738) | Cases (4251) | Rate ratio (95% CI) | <i>p</i> -value       | Rate ratio (95% CI)     | <i>p</i> -value       |  |  |
| <b>Opioid-containing analgesics (mg morphine equivalent / day)</b> |                  |              |                     |                       |                         |                       |  |  |
| <b>Ages 0-74 years</b>                                             |                  |              |                     |                       |                         |                       |  |  |
| 0                                                                  | 12039 (91%)      | 1057 (79%)   |                     |                       |                         |                       |  |  |
| 1-20                                                               | 820 (6%)         | 157 (12%)    | 2.24 (1.86, 2.69)   | 1 × 10 <sup>-17</sup> | 1.95 (1.59, 2.38)       | 1 × 10 <sup>-10</sup> |  |  |
| 21-50                                                              | 245 (2%)         | 68 (5%)      | 3.26 (2.47, 4.31)   | 8 × 10 <sup>-17</sup> | 3.06 (2.27, 4.11)       | 2 × 10 <sup>-13</sup> |  |  |
| ≥50                                                                | 168 (1%)         | 54 (4%)      | 3.66 (2.68, 5.01)   | 4 × 10 <sup>-16</sup> | 2.96 (2.08, 4.20)       | 1 × 10 <sup>-9</sup>  |  |  |
| <b>Ages 75+ years</b>                                              |                  |              |                     |                       |                         |                       |  |  |
| 0                                                                  | 20232 (86%)      | 2301 (79%)   |                     |                       |                         |                       |  |  |
| 1-20                                                               | 2286 (10%)       | 397 (14%)    | 1.56 (1.38, 1.75)   | 3 × 10 <sup>-13</sup> | 1.31 (1.14, 1.50)       | 1 × 10 <sup>-4</sup>  |  |  |
| 21-50                                                              | 602 (3%)         | 117 (4%)     | 1.75 (1.42, 2.15)   | 2 × 10 <sup>-7</sup>  | 1.39 (1.09, 1.76)       | 0.007                 |  |  |
| ≥50                                                                | 346 (1%)         | 100 (3%)     | 2.72 (2.16, 3.44)   | 4 × 10 <sup>-17</sup> | 2.17 (1.66, 2.84)       | 2 × 10 <sup>-8</sup>  |  |  |
| <b>Proton pump inhibitors (defined daily doses / day)</b>          |                  |              |                     |                       |                         |                       |  |  |
| <b>Ages 0-74 years</b>                                             |                  |              |                     |                       |                         |                       |  |  |
| 0                                                                  | 9298 (70%)       | 721 (54%)    |                     |                       |                         |                       |  |  |
| 0.5                                                                | 1318 (10%)       | 179 (13%)    | 1.79 (1.51, 2.14)   | 6 × 10 <sup>-11</sup> | 1.76 (1.45, 2.13)       | 7 × 10 <sup>-9</sup>  |  |  |
| 1                                                                  | 1513 (11%)       | 236 (18%)    | 2.10 (1.79, 2.46)   | 1 × 10 <sup>-19</sup> | 1.84 (1.54, 2.21)       | 2 × 10 <sup>-11</sup> |  |  |
| 1.5                                                                | 650 (5%)         | 119 (9%)     | 2.53 (2.04, 3.14)   | 3 × 10 <sup>-17</sup> | 2.18 (1.72, 2.78)       | 2 × 10 <sup>-10</sup> |  |  |
| 2 or more                                                          | 493 (4%)         | 81 (6%)      | 2.20 (1.72, 2.83)   | 5 × 10 <sup>-10</sup> | 1.99 (1.51, 2.62)       | 1 × 10 <sup>-6</sup>  |  |  |
| <b>Ages 75+ years</b>                                              |                  |              |                     |                       |                         |                       |  |  |
| 0                                                                  | 13409 (57%)      | 1548 (53%)   |                     |                       |                         |                       |  |  |
| 0.5                                                                | 2832 (12%)       | 400 (14%)    | 1.25 (1.11, 1.41)   | 2 × 10 <sup>-4</sup>  | 1.35 (1.18, 1.56)       | 2 × 10 <sup>-5</sup>  |  |  |
| 1                                                                  | 4118 (18%)       | 545 (19%)    | 1.16 (1.04, 1.29)   | 0.008                 | 1.13 (1.00, 1.28)       | 0.05                  |  |  |
| 1.5                                                                | 1884 (8%)        | 264 (9%)     | 1.22 (1.06, 1.41)   | 0.006                 | 1.08 (0.92, 1.28)       | 0.3                   |  |  |
| 2 or more                                                          | 1223 (5%)        | 158 (5%)     | 1.11 (0.93, 1.32)   | 0.3                   | 1.26 (1.03, 1.54)       | 0.03                  |  |  |

**Table S7.** Associations of severe COVID-19 with prescribed drugs in BNF chapter 2 by subparagraph code, restricted to those not resident in a care home and filtered to retain rows with at least 50 exposed individuals. Multivariate rate ratios are based on a joint model with all drug classes in the table as covariates

|                                                         | Univariate       |              |                     |                     | Multivariate        |                     |  |  |
|---------------------------------------------------------|------------------|--------------|---------------------|---------------------|---------------------|---------------------|--|--|
|                                                         | Controls (33803) | Cases (2357) | Rate ratio (95% CI) | p-value             | Rate ratio (95% CI) | p-value             |  |  |
| Cardiac glycosides                                      | 821 (2%)         | 94 (4%)      | 1.96 (1.54, 2.48)   | $3 \times 10^{-8}$  | 1.10 (0.85, 1.43)   | 0.5                 |  |  |
| Thiazides and related diuretics                         | 3860 (11%)       | 176 (7%)     | 0.71 (0.61, 0.84)   | $5 \times 10^{-5}$  | 0.86 (0.73, 1.02)   | 0.08                |  |  |
| Loop diuretics                                          | 3965 (12%)       | 558 (24%)    | 2.97 (2.64, 3.33)   | $7 \times 10^{-76}$ | 2.60 (2.28, 2.96)   | $1 \times 10^{-47}$ |  |  |
| Potassium-sparing diuretics and aldosterone antagonists | 704 (2%)         | 95 (4%)      | 2.08 (1.65, 2.63)   | $6 \times 10^{-10}$ | 1.20 (0.94, 1.54)   | 0.1                 |  |  |
| Potassium sparing diuretics and compounds               | 71 (0%)          | 5 (0%)       | 1.17 (0.45, 3.00)   | 0.8                 | 1.02 (0.39, 2.69)   | 1                   |  |  |
| Drugs for arrhythmias                                   | 171 (1%)         | 19 (1%)      | 1.71 (1.04, 2.80)   | 0.04                | 1.22 (0.73, 2.03)   | 0.4                 |  |  |
| Beta-adrenoceptor blocking drugs                        | 8270 (24%)       | 682 (29%)    | 1.39 (1.26, 1.54)   | $4 \times 10^{-11}$ | 1.06 (0.95, 1.19)   | 0.3                 |  |  |
| Centrally-acting antihypertensive drugs                 | 70 (0%)          | 3 (0%)       | 0.72 (0.22, 2.32)   | 0.6                 | 0.69 (0.21, 2.28)   | 0.5                 |  |  |
| Alpha-adrenoceptor blocking drugs                       | 1283 (4%)        | 69 (3%)      | 0.88 (0.68, 1.13)   | 0.3                 | 0.79 (0.61, 1.03)   | 0.08                |  |  |
| Angiotensin-converting enzyme inhibitors                | 8009 (24%)       | 518 (22%)    | 0.96 (0.86, 1.07)   | 0.5                 | 0.78 (0.69, 0.87)   | $2 \times 10^{-5}$  |  |  |
| Angiotensin-II receptor antagonists                     | 3790 (11%)       | 221 (9%)     | 0.88 (0.76, 1.03)   | 0.1                 | 0.72 (0.62, 0.85)   | $7 \times 10^{-5}$  |  |  |
| Nitrates                                                | 2843 (8%)        | 249 (11%)    | 1.40 (1.21, 1.62)   | $6 \times 10^{-6}$  | 0.98 (0.83, 1.16)   | 0.8                 |  |  |
| Calcium-channel blockers                                | 8256 (24%)       | 521 (22%)    | 0.98 (0.88, 1.09)   | 0.7                 | 1.04 (0.93, 1.16)   | 0.5                 |  |  |
| Other antianginal drugs                                 | 693 (2%)         | 70 (3%)      | 1.56 (1.20, 2.04)   | 0.001               | 1.13 (0.85, 1.50)   | 0.4                 |  |  |
| Peripheral vasodilators and related drugs               | 93 (0%)          | 8 (0%)       | 1.47 (0.69, 3.15)   | 0.3                 | 1.26 (0.58, 2.73)   | 0.6                 |  |  |
| Parenteral anticoagulants                               | 151 (0%)         | 23 (1%)      | 2.34 (1.47, 3.71)   | $3 \times 10^{-4}$  | 2.08 (1.29, 3.36)   | 0.003               |  |  |
| Oral anticoagulants                                     | 3868 (11%)       | 407 (17%)    | 1.87 (1.65, 2.11)   | $3 \times 10^{-23}$ | 1.49 (1.28, 1.74)   | $4 \times 10^{-7}$  |  |  |
| Antiplatelet drugs                                      | 8809 (26%)       | 687 (29%)    | 1.28 (1.16, 1.42)   | $1 \times 10^{-6}$  | 1.39 (1.23, 1.58)   | $2 \times 10^{-7}$  |  |  |
| Lipid-regulating drugs                                  | 14485 (43%)      | 1032 (44%)   | 1.17 (1.07, 1.29)   | $8 \times 10^{-4}$  | 1.00 (0.90, 1.12)   | 0.9                 |  |  |



**Table S8.** Associations of severe COVID-19 with prescribed drugs in BNF chapter 10 by approved name, restricted to those not resident in a care home and filtered to retain rows with at least 50 exposed individuals. Multivariate rate ratios are based on a joint model that includes all drugs in the table as covariates

|                                                                               | Univariate       |              |                     | Multivariate        |                     |                     |
|-------------------------------------------------------------------------------|------------------|--------------|---------------------|---------------------|---------------------|---------------------|
|                                                                               | Controls (33803) | Cases (2357) | Rate ratio (95% CI) | p-value             | Rate ratio (95% CI) | p-value             |
| <b>Non-steroidal anti-inflammatory drugs (excluding topical preparations)</b> |                  |              |                     |                     |                     |                     |
| Diclofenac                                                                    | 253 (1%)         | 22 (1%)      | 1.13 (0.72, 1.76)   | 0.6                 | 1.05 (0.67, 1.64)   | 0.8                 |
| Celecoxib                                                                     | 82 (0%)          | 11 (0%)      | 2.20 (1.13, 4.28)   | 0.02                | 2.12 (1.09, 4.14)   | 0.03                |
| Ibuprofen                                                                     | 635 (2%)         | 56 (2%)      | 1.24 (0.93, 1.64)   | 0.1                 | 1.23 (0.93, 1.64)   | 0.1                 |
| Meloxicam                                                                     | 132 (0%)         | 4 (0%)       | 0.42 (0.15, 1.16)   | 0.1                 | 0.43 (0.16, 1.19)   | 0.1                 |
| Etodolac                                                                      | 71 (0%)          | 9 (0%)       | 1.60 (0.78, 3.29)   | 0.2                 | 1.38 (0.66, 2.86)   | 0.4                 |
| Etoricoxib                                                                    | 78 (0%)          | 12 (1%)      | 1.94 (1.04, 3.63)   | 0.04                | 1.70 (0.90, 3.21)   | 0.1                 |
| <b>Rheumatic disease suppressant drugs</b>                                    |                  |              |                     |                     |                     |                     |
| Hydroxychloroquine sulfate                                                    | 209 (1%)         | 24 (1%)      | 2.12 (1.35, 3.31)   | 0.001               | 1.71 (1.05, 2.78)   | 0.03                |
| Methotrexate                                                                  | 328 (1%)         | 36 (2%)      | 1.88 (1.31, 2.70)   | $6 \times 10^{-4}$  | 1.55 (1.04, 2.30)   | 0.03                |
| <b>Gout and hyperuricaemia</b>                                                |                  |              |                     |                     |                     |                     |
| Allopurinol                                                                   | 1501 (4%)        | 176 (7%)     | 1.80 (1.51, 2.14)   | $3 \times 10^{-11}$ | 1.75 (1.47, 2.09)   | $5 \times 10^{-10}$ |
| Colchicine                                                                    | 288 (1%)         | 35 (1%)      | 1.69 (1.16, 2.46)   | 0.006               | 1.38 (0.94, 2.03)   | 0.1                 |
| <b>Skeletal muscle relaxants</b>                                              |                  |              |                     |                     |                     |                     |
| Baclofen                                                                      | 67 (0%)          | 28 (1%)      | 5.3 (3.3, 8.4)      | $2 \times 10^{-12}$ | 5.2 (3.3, 8.3)      | $4 \times 10^{-12}$ |
